# Supplementary material for: In situ interfacial growth of zeolitic imidazolate framework (ZIF-8) nanoparticles induced by a graphene oxide Pickering emulsion
Source: Royal Society of Chemistry journal article supplement (doi:10.1039/c5ra02779a), 2015-01-01
Supplement: c5ra02779a1.pdf [file c5ra02779a1.pdf]

# In-situ Interfacial Growth of Zeolitic Imidazolate Framework ( ZIF-8) Nanoparticles Induced by Graphene Oxide Pickering Emulsion

S1 :

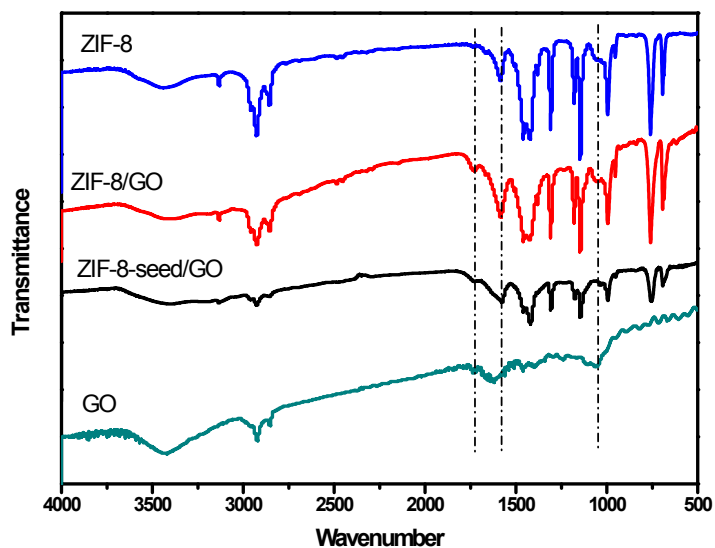

Figure S1. FTIR spectra of GO, ZIF-8, ZIF-8-Seed/GO, ZIF-8/GO composites, respectively.

S2:

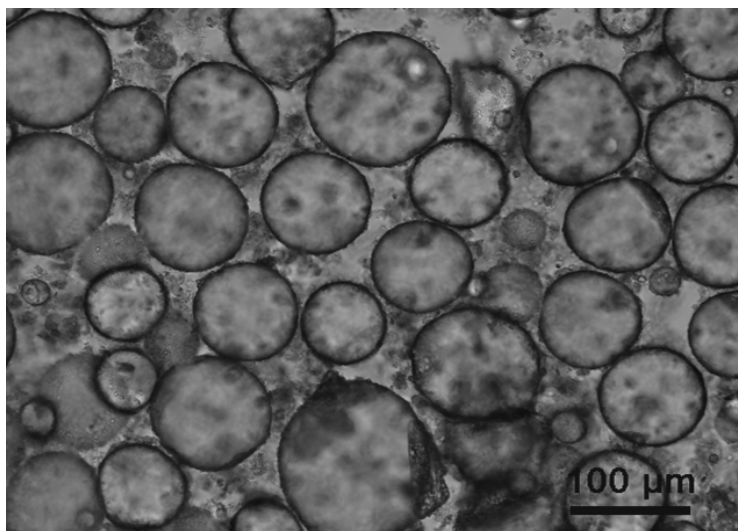

Figure S2. Optical micrographs of emulsions with concentrated MIM ligands and  $Zn^{2+}$

S3:

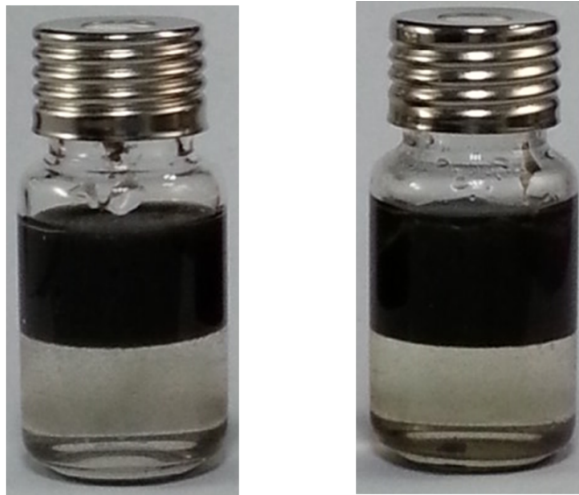

Figure S3. Photographs of Pickering emulsion prepared freshly (left) and preserved for 2 months (right).

S4:

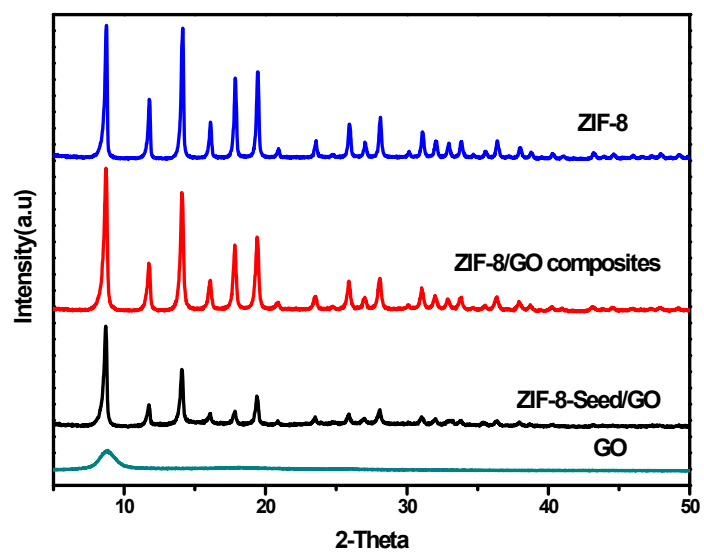

Figure S4. PXRD patterns of GO,ZIF-8, ZIF-8-Seed/GO, ZIF-8/GO composites, respectively.

S5:

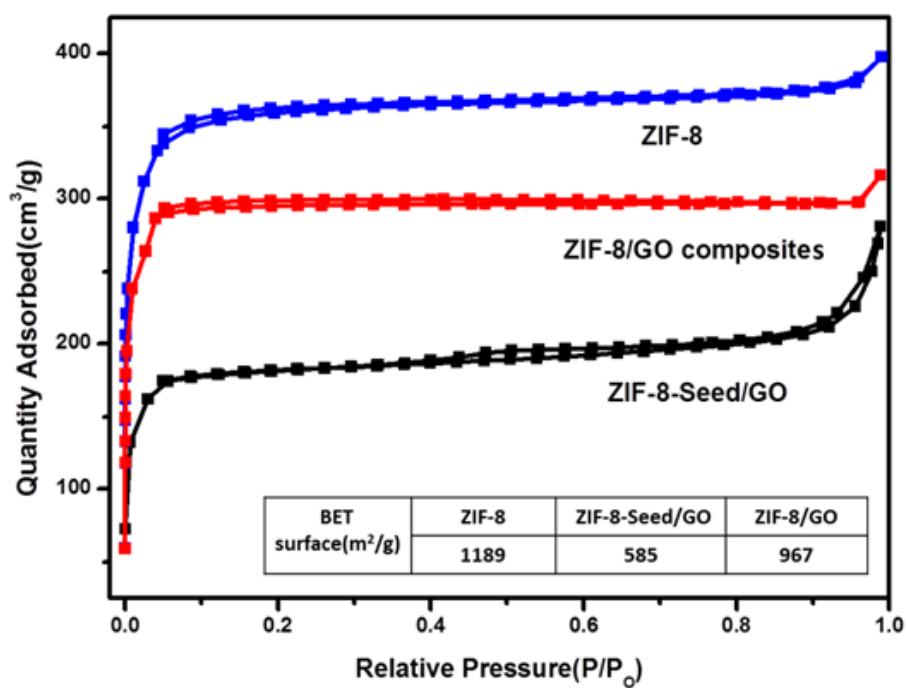

Figure S5. N<sub>2</sub> sorption isotherms of ZIF-8, ZIF-8-Seed/GO, ZIF-8/GO composites, respectively.

Table. Surface area of ZIF-8, ZIF-8-Seed/GO, ZIF-8/GO composites, respectively.
